# Supplementary material for: Genetic Diversity of Newcastle Disease Virus Involved in the 2021 Outbreaks in Backyard Poultry Farms in Tanzania
Source: MDPI journal article supplement (doi:10.3390/vetsci10070477), 2023-07-21
Supplement: s1 [file s1]

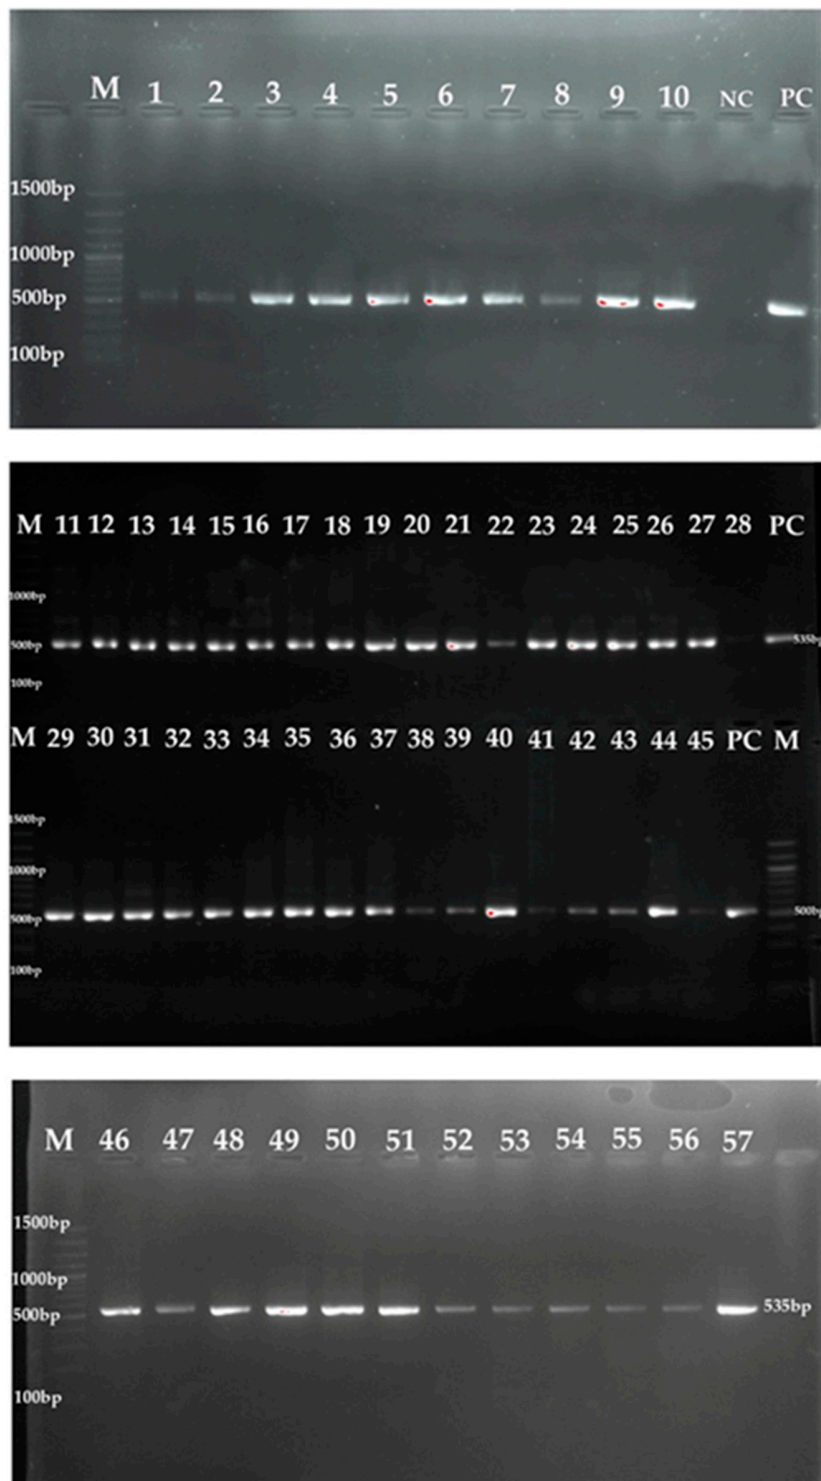

**Figure S1.** Gel electrophoresis of the amplified fusion gene of field isolates. The positive sample is 535 base pairs (bp) in size, Lane M 100-bp DNA Ladder, Lane 1-57 tested sample identification numbers, Lane PC known positive control sample, Lane NC Negative control (RNase free water)

**Table S1.** Comparison of NDV strains from the 2021 outbreaks in Tanzania and previously reported strains retrieved from NCBI GenBank.

| GenBank<br>accession # | Isolate ID | highest similar strain name      | similar strain<br>accession | percent<br>identity | Similar<br>strain<br>sub-<br>genotype |
|------------------------|------------|----------------------------------|-----------------------------|---------------------|---------------------------------------|
| OQ434700               | Aru53      | NDV/chicken/Mozambique/658/2012  | KU523528                    | 97.20%              | VII.2                                 |
| ON148417               | Aru54      | NDV/chicken/Mozambique/658/2012  | KU523528                    | 97.76%              | VII.2                                 |
| OQ434701               | Aru55      | NDV/chicken/Mozambique/658/2012  | KU523528                    | 96.82%              | VII.2                                 |
| ON148418               | Aru56      | NDV/chicken/Mozambique/658/2012  | KU523528                    | 98.13%              | VII.2                                 |
| ON148419               | Dom38      | NDV/chicken/Tanzania/Iringa/2020 | MW147368                    | 98.13%              | VII.2                                 |
| OQ434702               | Dom52      | NDV/chicken/Mozambique/658/2012  | KU523528                    | 96.07%              | VII.2                                 |
| OQ434703               | Dar14      | NDV/chicken/Mozambique/658/2012  | KU523528                    | 96.45%              | VII.2                                 |
| ON148420               | Dar16      | NDV/chicken/Tanzania/Iringa/2020 | MW147368                    | 98.50%              | VII.2                                 |
| ON148421               | Dar22      | NDV/chicken/Mozambique/658/2012  | KU523528                    | 98.32%              | VII.2                                 |
| OQ434704               | Dar25      | NDV/chicken/Mozambique/658/2012  | KU523528                    | 97.38%              | VII.2                                 |
| ON148422               | Dar30      | NDV/chicken/Mozambique/658/2012  | KU523528                    | 96.82%              | VII.2                                 |
| OQ434705               | Dar35      | NDV/chicken/Tanzania/Iringa/2020 | MW147368                    | 96.26%              | VII.2                                 |
| OQ434706               | Ir9        | NDV/chicken/Mozambique/658/2012  | KU523528                    | 96.64%              | VII.2                                 |
| OQ434707               | Ir10       | NDV/chicken/Mozambique/658/2012  | KU523528                    | 96.64%              | VII.2                                 |
| OQ434708               | Ir13       | NDV/chicken/Mozambique/658/2012  | KU523528                    | 96.64%              | VII.2                                 |
| OQ434709               | Ir17       | NDV/chicken/Mozambique/658/2012  | KU523528                    | 96.64%              | VII.2                                 |
| ON148423               | Iri19      | NDV/chicken/Mozambique/658/2012  | KU523528                    | 97.94%              | VII.2                                 |
| OQ434710               | Ir20       | NDV/chicken/Mozambique/658/2012  | KU523528                    | 96.64%              | VII.2                                 |
| ON148424               | Iri24      | NDV/chicken/Mozambique/658/2012  | KU523528                    | 97.38%              | VII.2                                 |
| OQ434711               | Ir29       | NDV/chicken/Mozambique/658/2012  | KU523528                    | 96.64%              | VII.2                                 |
| OQ434712               | Ir32       | NDV/chicken/Mozambique/658/2012  | KU523528                    | 96.64%              | VII.2                                 |
| ON148425               | Iri36      | NDV/chicken/Mozambique/658/2012  | KU523528                    | 97.20%              | VII.2                                 |
| ON148426               | Mor12      | NDV/chicken/Tanzania/Iringa/2020 | MW147368                    | 98.88%              | VII.2                                 |
| OQ434713               | Mor21      | NDV/chicken/Mozambique/658/2012  | KU523528                    | 97.38%              | VII.2                                 |
| OQ434714               | Mor37      | NDV/chicken/Mozambique/658/2012  | KU523528                    | 96.64%              | VII.2                                 |
| OQ434715               | Mor42      | NDV/chicken/Mozambique/658/2012  | KU523528                    | 96.64%              | VII.2                                 |
| OQ434716               | Mor46      | NDV/chicken/Mozambique/658/2012  | KU523528                    | 96.64%              | VII.2                                 |
| ON148427               | Mor48      | 11Vac (Tanzania)                 | MT335748                    | 99.44%              | XIII.1.1                              |
| OQ434717               | Mor57      | NDV/chicken/Mozambique/658/2012  | KU523528                    | 96.64%              | VII.2                                 |
| ON148432               | Sum4       | NDV/chicken/Mozambique/658/2012  | KU523528                    | 98.50%              | VII.2                                 |
| ON148428               | Sum11      | NDV/chicken/Mozambique/658/2012  | KU523528                    | 97.01%              | VII.2                                 |
| ON148429               | Sum18      | NDV/chicken/Mozambique/658/2012  | KU523528                    | 96.64%              | VII.2                                 |
| OQ434718               | Sum33      | NDV/chicken/Tanzania/Iringa/2020 | MW147368                    | 98.13%              | VII.2                                 |
| OQ434719               | Sum34      | NDV/chicken/Mozambique/658/2012  | KU523528                    | 96.82%              | VII.2                                 |
| OQ434720               | Sum39      | NDV/chicken/Mozambique/658/2012  | KU523528                    | 96.64%              | VII.2                                 |
| ON148430               | Sum44      | NDV/chicken/Tanzania/Iringa/2020 | MW147368                    | 99.44%              | VII.2                                 |
| OQ434721               | Sum47      | NDV/chicken/Tanzania/Iringa/2020 | MW147368                    | 98.13%              | VII.2                                 |
| ON148431               | Sum49      | NDV/chicken/Mozambique/1205/2011 | KX231366                    | 98.67%              | VII.2                                 |
| ON148433               | Sum50      | chicken/South Africa/RBNW-1/2013 | MF622045                    | 97.57%              | VII.2                                 |

|          |       |                                  |          |        |       |
|----------|-------|----------------------------------|----------|--------|-------|
| ON148434 | Sum51 | chicken/South Africa/RBNW-1/2013 | MF622045 | 98.95% | VII.2 |
|----------|-------|----------------------------------|----------|--------|-------|
